# Supplementary material for: Antarctic Ice Mass Change Products from GRACE/GRACE-FO Using Tailored Sensitivity Kernels
Source: MDPI journal article supplement (doi:10.3390/rs13091736), 2021-04-29
Supplement: s1 [file s1]

Archive with 1 entries (1 files):
- groh_grace_kernel_ais_rev1_SM.pdf
